# Supplementary material
Source: PubMed Central journal article supplement (PMC4721235)
Supplement: NIHMS335905-supplement-1_si_001.pdf [file NIHMS335905-supplement-1_si_001.pdf]

## Supporting Information

# **Nuclear Targeted Silver Nanospheres Perturb the Cancer Cell Cycle Differently from those of Nanogold**

Lauren A. Austin<sup>†</sup>, Bin Kang<sup>†,‡</sup>, Chun-Wan Yen<sup>†</sup>, Mostafa A. El-Sayed<sup>†,\*</sup>

<sup>†</sup>Laser Dynamics Laboratory, School of Chemistry and Biochemistry, Georgia Institute of Technology, Atlanta, GA 30332-0400

<sup>‡</sup>Permanent address: College of Material Science and Technology, Nanjing University of Aeronautics and Astronautics, Nanjing 210016, P.R. China

\*Corresponding Author Email: [melsayed@gatech.edu](mailto:melsayed@gatech.edu)

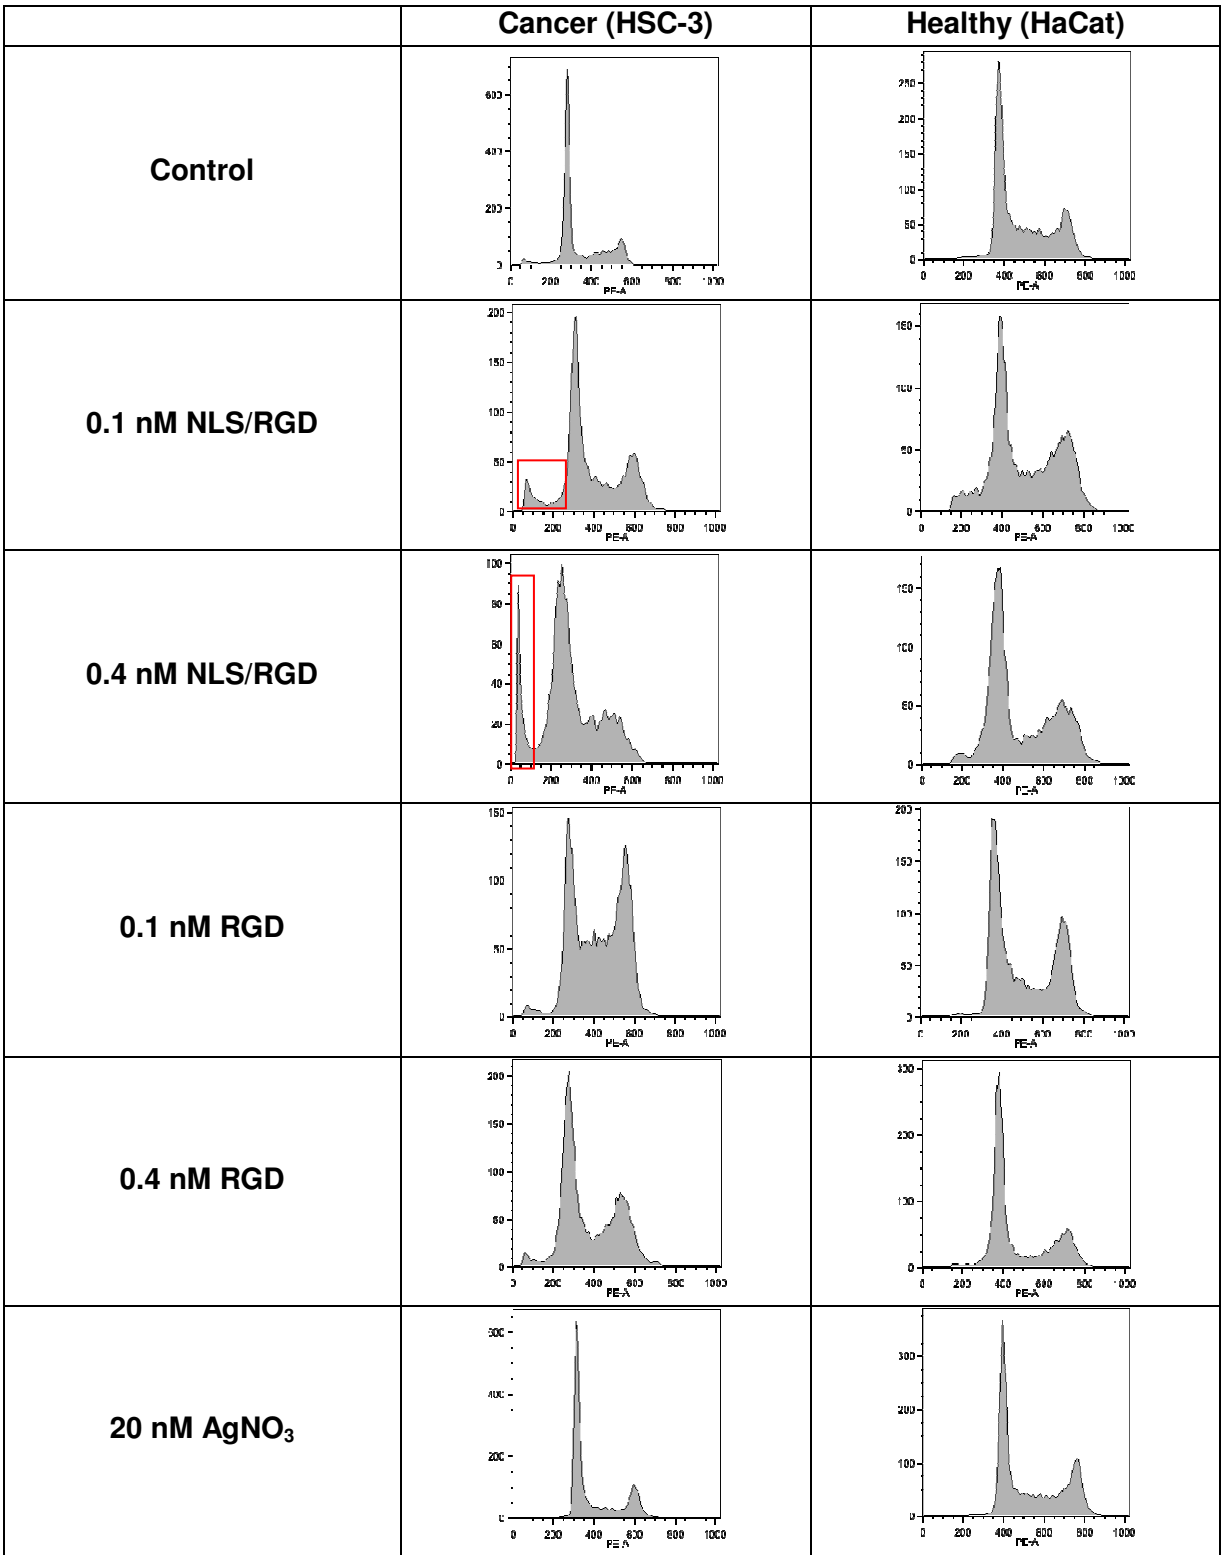

**Figure S1.** DNA histograms of cancer and healthy cells treated with conjugated AgNPs. Nuclear targeting (NLS/RGD) AgNPs caused the increase in the sub G1 population of cancer cells (red box) and G2 accumulation in both cancer and healthy cells.

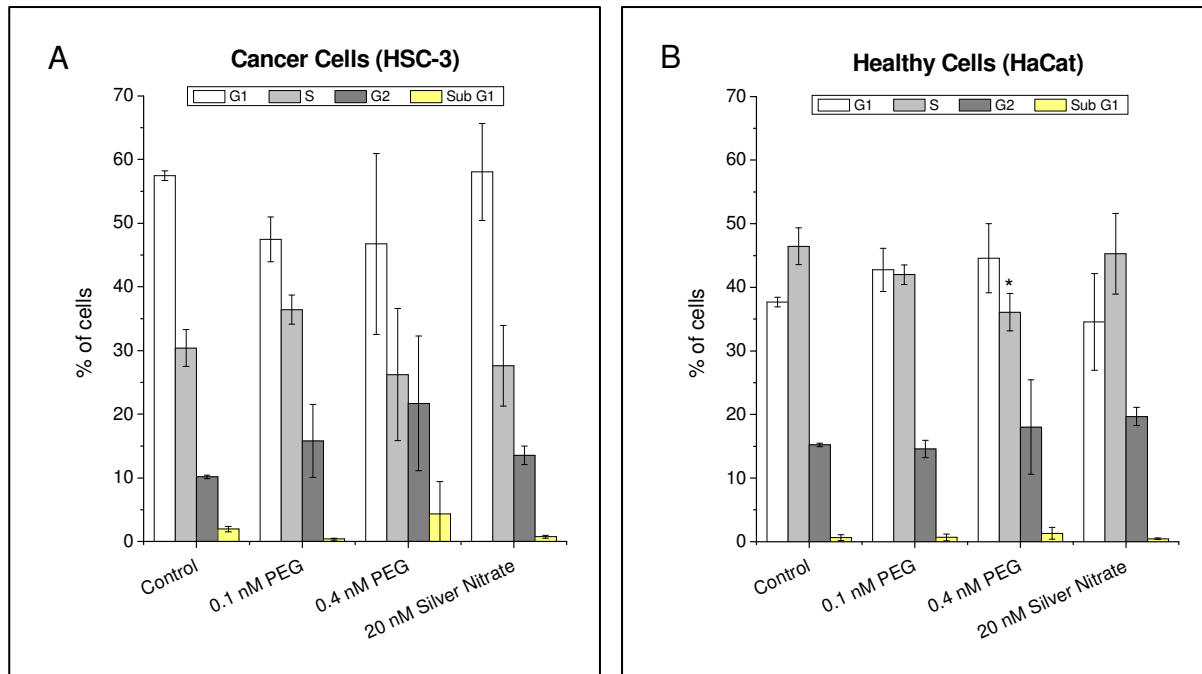

**Figure S2.** Cell cycle analysis of cancer (A) and healthy (B) cells treated with 0.1 nM PEG-AgNPs and 0.4 nM PEG-AgNPs. There was no significant alteration in the cell cycle in both cell models when compared to their controls.

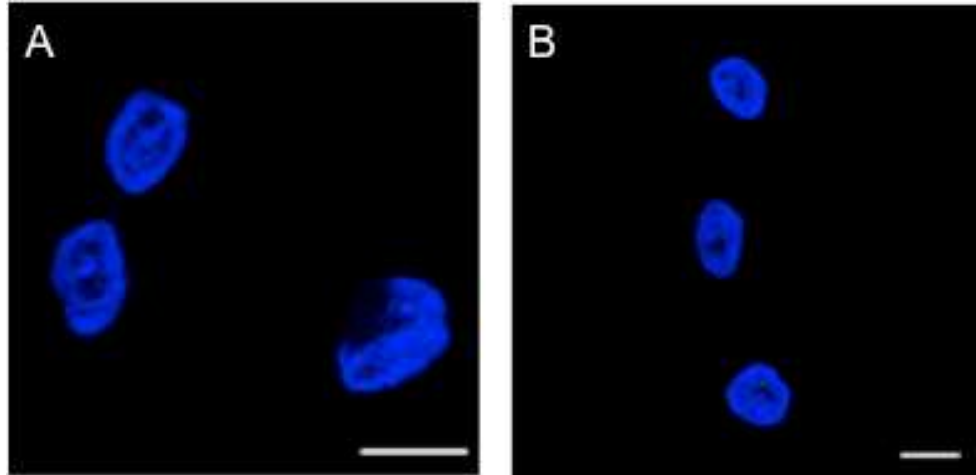

**Figure**

**S3.**

Confocal images of healthy (HaCat) cells after treatment with NLS/RGD-AgNPs. DNA double strand breaks, detected by the green fluorescence foci, were not seen in either untreated (A) or 0.4 nM NLS/RGD-AgNPs treated (B) healthy cells. Cells were incubated with nuclear targeting AgNPs for 24 hours. Scale bar: 10  $\mu\text{m}$ .
